# Supplementary material for: De novo assembly and analysis of the transcriptome of Rumex patientia L. during cold stress
Source: PLoS One. 2017 Oct 12;12(10):e0186470. doi: 10.1371/journal.pone.0186470 (PMC5638559; doi:10.1371/journal.pone.0186470)
Supplement: S1 Table — (XLSX) [file pone.0186470.s001.xlsx]

## Sheet: Sheet1
S1 Table DNA oligos used in qRT-PCR
Unigene	Direction	Sequence (5' to 3')
c68449_g1	Forward	GGAAGTTCAAGCCCGCCTAT
	Reverse	TTGGGCTCACGGGTCTCAC
c63591_g1	Forward	GCCGCCACAGGAATACAATAA
	Reverse	GCAGGAAGCATCATCCCATT
c76039_g1	Forward	CCACCGTCAATGGATGCTCT
	Reverse	GTGGTGCTCGTGGTGGCT
c76748_g3	Forward	CCTCGTCACCTGGACAAACAC
	Reverse	CAGACCCGAGCCCGTTGT
c76748_g1	Forward	CGAGCCCAACAAGAAGACC
	Reverse	CGGAGTCGGCGAAGTTGA
c76501_g1	Forward	GAGGATGGACTGGAGGGACG
	Reverse	CGTCATCGTCCACGTAAGCA
c50023_g1	Forward	TAGTGTTGTGGGTGTTCGTGGT
	Reverse	TGACAGCCCATAACTTCCCTCT
c68197_g6	Forward	TGAATCAGGCAAAGTAGGGACC
	Reverse	AACTCTATCCGCTCGCCATT
c57726_g1	Forward	GGGAGGCTGTTACCGCTTAG
	Reverse	TCCAACCCACGGTGTCCTC
c68060_g2	Forward	TCTTGTGCCCTTACCTCATCC
	Reverse	GGTCCGAGTTCGCTGGTCT
Actin	Forward	GCTCATCCTGTCGGCAATAC
	Reverse	ACGAGACTACCTACAACTCCATC
